# Supplementary material
Source: Springer Nature journal article supplement (https://www.springermedizin.de/resource/supplementary/12914_2008_79_MOESM2_ESM.pdf/9537468)
Supplement: MOESM2 [file 9537468]

**1238** Aboriginal Babies born at RDH: Jan 1987-March 1990

**686** Recruited to cohort

**27** Deaths

**591** Traced

**68** Untraced

**469** Examined 2005-2008

**122** Not examined

**11** Refusals

**469**

Anthropometric  
measurements

**445**

Venous  
blood taken

**430**

Urine  
sample

**393**

Emotional  
wellbeing  
questionnaire

**442**

Dental  
assessment

**458**

Life style  
factors

**156**

Fasting  
overnight

**263**

Cognitive  
function

**454**

Blood  
pressure

**375**

Grip  
strength
